# Supplementary material for: Bioelectronic protein nanowire sensors for ammonia detection
Source: Springer Nature journal article supplement (doi:10.1007/s12274-020-2825-6), 2020-05-01
Supplement: MOESM1 [file 12274_2020_2825_MOESM1_ESM.pdf]

# Electronic Supplementary Material

## Bioelectronic protein nanowire sensors for ammonia detection

Alexander F. Smith<sup>1</sup>, Xiaomeng Liu<sup>2</sup>, Trevor L. Woodard<sup>3</sup>, Tianda Fu<sup>2</sup>, Todd Emrick<sup>4</sup>, Juan M. Jiménez<sup>1,5,6</sup>, Derek R. Lovley<sup>3,6</sup> (✉), and Jun Yao<sup>1,2,6</sup> (✉)

<sup>1</sup> Department of Biomedical Engineering, University of Massachusetts, Amherst, MA 01003, USA

<sup>2</sup> Department of Electrical and Computer Engineering, University of Massachusetts, Amherst, MA 01003, USA

<sup>3</sup> Department of Microbiology, University of Massachusetts, Amherst, MA 01003, USA

<sup>4</sup> Department of Polymer Science and Engineering, University of Massachusetts, Amherst, MA 01003, USA

<sup>5</sup> Department of Mechanical and Industrial Engineering, University of Massachusetts, Amherst, MA 01003, USA

<sup>6</sup> Institute for Applied Life Sciences (IALS), University of Massachusetts, Amherst, MA 01003, USA

Supporting information to <https://doi.org/10.1007/s12274-020-2825-6>

### This PDF file includes

Figures S1 to S5

References

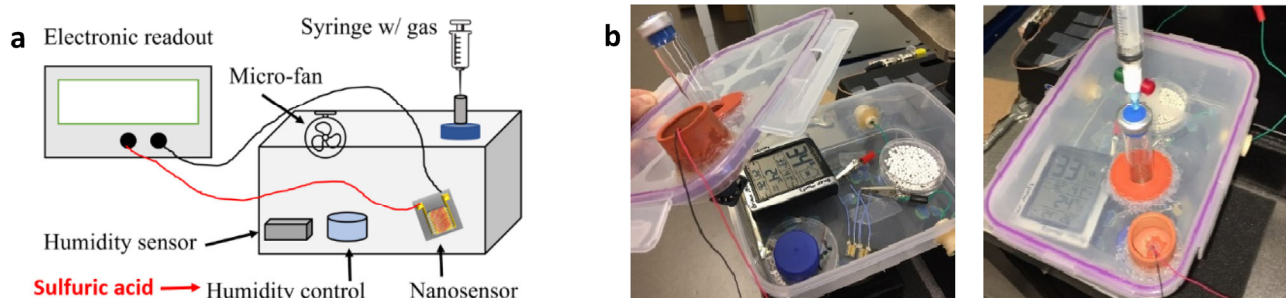

**Figure S1** (a) Schematic of custom-built vapor chamber testing system and electronic readout. (b) Photograph of vapor chamber system before (open-lid, left) and after (closed-lid, right) exposing the sensor to gas.

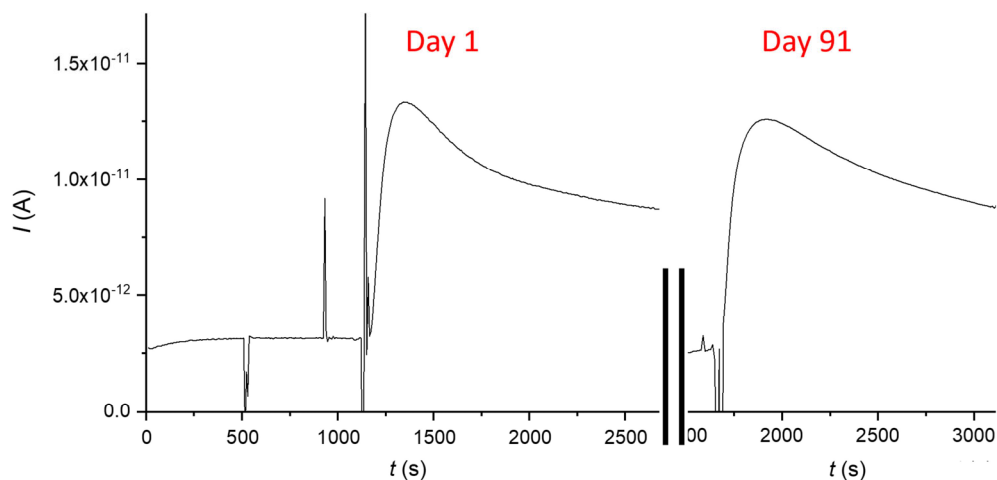

**Figure S2** Stable, repeatable, and consistent response of the sensor to 100 ppm ammonia gas over 90 days at 47-57 %RH. The initial sharp spikes were artifacts (e.g., mechanical perturbation to contacts/connections) during gas injection.

Address correspondence to Derek R. Lovley, [dlovley@microbio.umass.edu](mailto:dlovley@microbio.umass.edu); Jun Yao, [juny@umass.edu](mailto:juny@umass.edu)

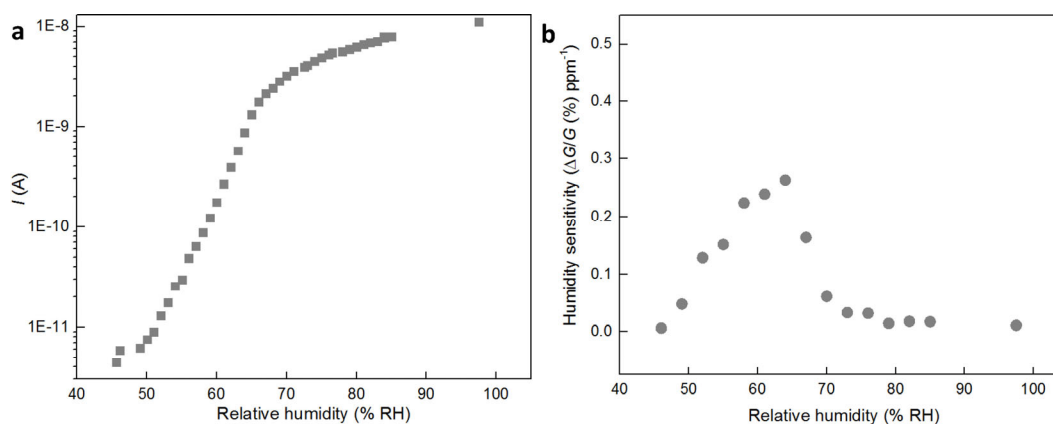

**Figure S3** (a) Current output of a protein nanowire device measured as a function of relative humidity in the vapor chamber environment. (b) Converted humidity sensitivity. Temperature was kept constant at 23 °C.

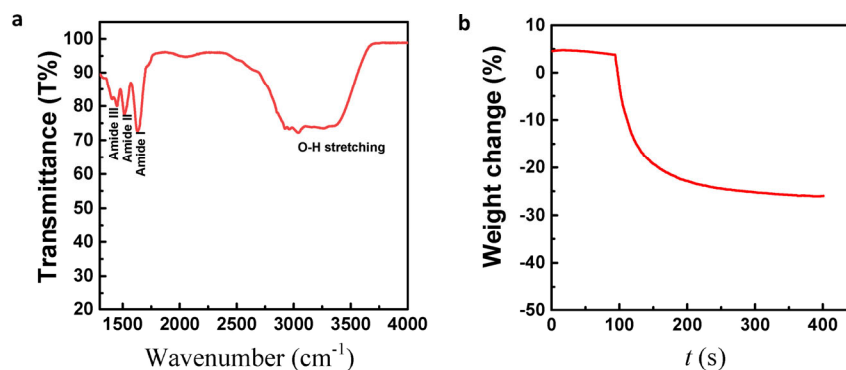

**Figure S4** Moisture-adsorption measurement in thin films. (a) Fourier-transform infrared spectroscopy (FTIR) spectrum of a protein nanowire film (~200 nm thickness) at relative humidity (RH) of 40%. The broad peak ~3400  $\text{cm}^{-1}$  corresponds to the O-H stretching band in free water.<sup>1</sup> (b) Weight percentage of adsorbed moisture in a protein nanowire film measured by quartz crystal microbalance (QCM; 400C, CH Instruments). The protein nanowire film was first deposited on the quartz crystal resonator (right top) by drop-casting. The mass sensitivity of the QCM originates from the dependence of the oscillation frequency on the total mass of the metal-coated crystal, including any deposited material. The mass change was determined by  $\Delta m = -\Delta f \cdot A \cdot \frac{\sqrt{\mu\rho}}{2f_0^2}$ , where  $f_0$ ,  $A$ ,  $\rho$ ,  $\mu$  are resonant frequency of crystal's fundamental mode, area of the gold disk on the crystal, crystal's density (2.684  $\text{g}\cdot\text{cm}^{-3}$ ) and shear modulus of quartz (2.947 $\times 10^{11}$   $\text{g}\cdot\text{cm}^{-1}\cdot\text{s}^{-2}$ ), respectively.<sup>2</sup> We first determined the mass of the film ( $W_{\text{film}}$ ) in a RH~40% environment by QCM. Then the film was exposed to a RH~0% environment by constant flow of dry air to drive out the adsorbed moisture. During the process, the mass change ( $\Delta W_{\text{film}}$ ) that corresponds to the amount of moisture adsorption in the film was continuously monitored (reflected by the resonant-frequency change in QCM). The moisture weight percentage  $W_{\text{H}_2\text{O}}\%$  in the film was determined by:  $W_{\text{H}_2\text{O}}\% = \Delta W_{\text{film}}/W_{\text{film}}\times 100\%$ .

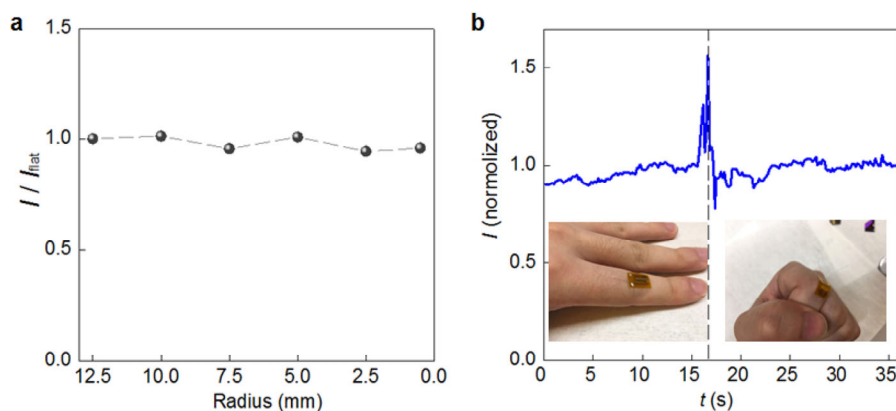

**Figure S5** Mechanical testing. (a) Sensor current ( $I$ ) at different bending radii with respect to current ( $I_{\text{flat}}$ ) measured at flat state. (b) Current change in the sensor attached to a bending finger joint. The overall current fluctuation largely came from local RH fluctuation experienced during the bending events. The spike signal came from mechanical perturbation to, e.g., wiring to contacts.

## References

- [1] Kong, J.; Yu, S. *Acta. Biochim. Biophys. Sin.* **2007**, *39*, 549-559.
- [2] <http://www.chinstruments.com/chi400.shtml>.
